# Supplementary material
Source: MDPI journal article supplement (https://www.mdpi.com/2073-4441/9/4/270)
Supplement: s1 [file s1]

## Sheet: example
	Cost estimation of each LID practice
	An average roof area =			0.032516	ha
	RWH volume for each house =			1000	gal
	LID area in each subbasin (ha)	RGs	RWHs	PPs
	Sub 2			8.56561
	Sub 3	6.66214	16.6554
	Sub 4	7.88403	19.7101
	Type	Average cost	Unit	Unit conversion ($/ha)	Interest rate	Maintenance percentage	LID design life (yr)	Maintenance cost ($/ha/yr)	Installation cost ($/ha/yr)	Cost ($/ha/yr)
	RGs	6	$/sq.ft	645835	0.045	0.05	20	50651.9	77878.4	128530
	PPs	14	$/sq.ft	1.50695e+06	0.045	0.05	20	118188	181716	299904
	RWHs	1	$/gal	30754.1	0.045	0.01	20	482.4	3708.5	4190.9
	Targeted variable		Surface runoff (SURQ)
	Targeted goal		88.08	mm (Case 5)
	Step 1			Step 2	Step 3	Step 4
	Type	Location	SURQ (mm)	Reduction by LID practices (mm)	Annual cost ($)	Cost per unit reduction ($/mm)	Ranking
	None	-	473.316	-	-	-	-
	RGs	Sub 3	425.416	47.9003	856287	17876.4	4
	RGs	Sub 4	413.404	59.9123	1.01334e+06	16913.7	3
	PPs	Sub 2	455.438	17.8783	2.56886e+06	143686	5
	RWHs	Sub 3	468.887	4.42967	69801	15757.6	2
	RWHs	Sub 4	467.917	5.39933	82603	15298.7	1
	Step 5							Step 6
	Ranking	Type	Location	Reduction by LID practices (mm)	% allocation	Reduction by % allocation (mm)	Accumulation of reduction (mm)	Cost per unit reduction ($/mm)	Cost ($)
	1	RWHs	Sub 4	5.39933	1	5.39933	5.39933	15298.7	82603
	2	RWHs	Sub 3	4.42967	1	4.42967	9.829	15757.6	69801
	3	RGs	Sub 4	59.9123	1	59.9123	69.7413	16913.7	1.01334e+06
	4	RGs	Sub 3	47.9003	0.3828	18.3362	88.0776	17876.4	327787
	5	PPs	Sub 2	17.8783				143686	0
	Summary of results for Case 5
	Ranking	Type	Location	% allocation		Total cost (TC)
	1	RWHs	Sub 4	1		1.49353e+06	($/yr)
	2	RWHs	Sub 3	1		Cost per unit reduction (CPR)
	3	RGs	Sub 4	1		16956.5	($/mm)
	4	RGs	Sub 3	0.3828
	5	PPs	Sub 2	0
To meet requirements of each county
	if minimum detention rate required in a county,				0.153839	ac-ft/ac
	if the rest of water except for water captured by LIDs is considered by						detention pond
							Interest rate =	0.045
							Maintenance percentage from a construction cost =	0.05
							LID design life (yr) =	20
	calculation for volume captured by LIDs
	Ranking	Type	Location	LIDs area (ha)	Amount captured by LIDs (mm)	Volume captured by LIDs (ac-ft)
	1	RWHs	Sub 4	5.39933	12.94	0.566424
	2	RWHs	Sub 3	4.42967	12.94	0.4647
	3	RGs	Sub 4	59.9123	19.11	9.28206
	4	RGs	Sub 3	18.3362	19.11	2.84079
	5	PPs	Sub 2	0	32.52	0
					Total volume captured by LIDs (ac-ft) =	13.154
					Volume retained in LIDs per urban area (ac-ft/ac) =	#REF!
	Volume that should be detained by detention pond =					#REF!	ac-ft/ac =	#REF!	ft3
	Cost estimation for detention pond
			installation cost =			#REF!	$/yr
			maintenance cost =			#REF!	$/yr
			total cost =			#REF!	$/yr
